# Supplementary material
Source: PubMed Central journal article supplement (PMC3230303)

## Supplementary Appendix

This appendix has been provided by the authors to give readers additional information about their work.

Supplement to: Ramsey BW, Davies J, McElvaney NG, et al. A CFTR potentiator in patients with cystic fibrosis and the *G551D* mutation. *N Engl J Med* 2011;365:1663-72.

**SUPPLEMENTARY APPENDIX**

**“A CFTR Potentiator in Patients with Cystic Fibrosis Who Have the G551D Mutation”**

**Ramsey BW, Davies J, McElvaney NG et al.**

**CONTENTS**

**Detailed Methodology**

*Subjects*.....2  
*Treatment Adherence*.....2  
*Endpoints*.....2  
*Statistical Analyses*.....6

**Additional Acknowledgments**.....7

**Supplemental References**.....:

**Supplemental Tables and Figures**.....00

Supplemental Table 1.....0  
Supplemental Table 2.....32  
Supplemental Table 3.....13  
Supplemental Table 4.....14  
Supplemental Table 5.....15  
Supplemental Table 6.....16  
Supplemental Figure 1.....17  
Supplemental Figure 2.....18  
Supplemental Figure 3.....19  
Supplemental Figure 4.....3:

## **DETAILED METHODOLOGY**

### ***Subjects***

Eligible subjects had to have a confirmed diagnosis of CF,<sup>1</sup> accompanied by either chronic sinopulmonary disease or gastrointestinal/nutritional abnormalities and a sweat chloride value  $\geq 60$  mmol/L by quantitative pilocarpine iontophoresis on at least one occasion. Subjects were required to have the *G551D-CFTR* mutation on at least one *CFTR* allele. *CFTR* genotype confirmation was performed using a 32 mutation panel (Ambry Genetics). Full gene sequencing was performed on samples where the mutation panel did not identify two *CFTR* mutations.

At screening, subjects had to be  $\geq 12$  years of age and demonstrate an FEV<sub>1</sub> of 40-90% of predicted value for age, gender, and height (Knudson standards<sup>2</sup>). Subjects were excluded if they had other illnesses that confounded the study results; ongoing illness; a pulmonary exacerbation or changes in therapy (including antibiotics) for pulmonary disease within 4 weeks before first dose of study drug; abnormal liver function tests, defined as 3 or more LFT parameters  $>3$  times the upper limit of normal; or abnormal renal function tests. Subjects were also excluded if they had a history of prolonged QT/QTc interval; history of solid organ or hematological transplantation; colonization with organisms associated with a more rapid decline in pulmonary status (e.g., *B. cenocepacia*, *B. dolosa*, and *M. abscessus*); concomitant use of any inhibitors or inducers of CYP3A4; or use of inhaled hypertonic saline treatment. Subjects were required to stop inhaled hypertonic saline treatment for at least 4 weeks prior to Day 1 (first dose of study drug).

### ***Treatment Adherence***

To ensure treatment adherence, site personnel reviewed study drug dosing requirements with the subject at each study visit. Compliance was also confirmed by ongoing drug accountability.

### ***Endpoints***

The primary efficacy endpoint was the absolute change in percent predicted FEV<sub>1</sub> from baseline through Week 24. Secondary endpoints included change from baseline in percent predicted FEV<sub>1</sub> through Week 48, time-to-first pulmonary exacerbation through Weeks 24 and 48, subject-reported respiratory symptoms through Weeks 24 and 48 as measured by the Cystic Fibrosis Questionnaire-Revised (CFQR), change from baseline in weight at Weeks 24 and 48, and changes from baseline in sweat chloride concentration, a biomarker of *CFTR* channel function. Tertiary efficacy endpoints included duration of pulmonary exacerbations, duration of hospitalizations and duration of antibiotic therapy for

sinopulmonary signs/symptoms. The study also evaluated the safety and adverse event profile of ivacaftor.

Spirometry was performed according to American Thoracic Society guidelines.<sup>3</sup> Assessments were to be performed prior to the use of bronchodilators (at least 4 hours since last short-acting  $\beta$ -agonist or anticholinergic, 12 hours since last long-acting treatment, and 24 hours since the last once-daily treatment) and prior to study drug administration on the day of the visit. FEV<sub>1</sub>, forced vital capacity (FVC), and forced midexpiratory flow rate (FEF<sub>25-75%</sub>) were determined. Values were recorded as volumes (L) for FEV<sub>1</sub> and FVC or rate (L/s) for FEF<sub>25-75%</sub> and as percent predicted for age, gender, and height.<sup>2</sup>

Time-to-first pulmonary exacerbation was evaluated as a secondary efficacy measure. Pulmonary exacerbation in this study was defined using a modified Fuchs criteria of new or a change in antibiotic therapy (IV, inhaled, or oral) for any 4 or more of the following symptoms: new or increased hemoptysis; increased cough; increased dyspnea; malaise, fatigue, or lethargy; temperature above 38°C; anorexia or weight loss; sinus pain or tenderness; change in sinus discharge; change in physical examination of the chest; decrease in pulmonary function by 10%; radiographic changes indicative of pulmonary infection.<sup>4</sup> A subject with no events before withdrawal or completion of the study period was considered censored at the time of withdrawal or completion of the study period.

Subject-reported respiratory symptoms were assessed using the Respiratory domain score of the Cystic Fibrosis Questionnaire-Revised (CFQ-R), a disease-specific health-related quality of life questionnaire.<sup>5</sup> The CFQ-R was administered to subjects prior to administration of study drug and any other assessment at the visit. The adult/adolescent or child versions of the CFQ-R were administered as appropriate. The primary analytical focus was determined *a priori* to be the respiratory health domain using a pooling of all self-response questionnaire versions (e.g., Adult/Adolescent and Child versions). Responses are provided on a 4-point Likert scale and rescaled within each domain to a score range from zero to 100 points. Higher scores represent better health.

Weight was measured with shoes off and before the morning dose of study drug.

Sweat testing was determined by pilocarpine iontophoresis and samples were collected using an approved Macroduct<sup>®</sup> (Wescor, Logan UT) collection device as described previously.<sup>6</sup> Sweat samples were sent to a central laboratory for testing and interpretation of results (University of Colorado). The sweat test was

conducted within a window of  $\pm 2$  hours relative to the morning dose of study drug except for the first study day, when the sweat chloride test was performed prior to the dose and may have been done the previous day.

Safety was evaluated by assessment of adverse events, clinical laboratory tests, standard digital electrocardiograms (ECGs), 24-hour ambulatory ECGs, vital signs, and physical examinations.

The only pre-specified criterion for drug interruption was elevated liver enzymes: ALT or AST  $> 8 \times$  ULN; ALT or AST  $> 5 \times$  ULN for more than 2 weeks; total bilirubin  $> 2 \times$  ULN and/or clinical jaundice, in association with elevation of ALT; AST  $> 3 \times$  ULN.

Predefined criteria for study drug withdrawal included:

- A female subject has a confirmed pregnancy or, in the case of male subjects, their female partner becomes pregnant.
- A subject's study treatment assignment becomes unblinded to the subject, the site staff, or the blinded Vertex staff.
- A subject experiences an arrhythmia or conduction abnormality, including but not limited to prolonged QTcF interval, where the severity is categorized as CTCAE Grade 3 or higher.
- A subject experiences an elevated alanine transaminase (ALT) or aspartate transaminase (AST) of  $> 8 \times$  ULN; or ALT or AST  $> 5 \times$  ULN for more than 2 weeks; or total bilirubin  $> 2 \times$  ULN and/or clinical jaundice, in association with elevation of ALT and AST  $> 3 \times$  ULN.
- And no convincing alternative etiology (e.g., viral hepatitis, alcohol ingestion) for the elevated transaminase is identified, regardless of whether ALT or AST levels had improved

### ***Statistical Analyses***

Primary analysis for absolute change from baseline in percent predicted FEV<sub>1</sub> through Week 48, absolute change from baseline in CFQ-R score, and absolute change from baseline in sweat chloride was similar to that of the primary efficacy endpoint (i.e., based on a Mixed-Effects Model for Repeated Measures [MMRM]). However, change from baseline in weight was analyzed using a linear mixed effect (LME) model and time to first pulmonary exacerbation was analyzed using Cox regression and Kaplan-Meier methods. Descriptive statistics (raw values) were summarized for chemistry, hematology, vital signs, and ECG parameters.

To control the overall type I error rate, the primary and key secondary endpoints (absolute change from baseline in pooled respiratory CFQ-R score through Week 24, absolute change from baseline in sweat chloride through Week 24, time to first pulmonary exacerbation through Week 48, and absolute change from baseline in weight at Week 48) were analyzed using the following multi-stage gate keeping procedure:

1. The primary efficacy endpoint was tested at significance level  $\alpha = 0.05$ .
2. If a statistically significant result was obtained from test 1, absolute change from baseline in CFQ-R respiratory domain score through Week 24 and change from baseline in sweat chloride through Week 24 was tested using Hochberg's step-up procedure at significance level  $\alpha = 0.05$ .
3. If a statistically significant result was obtained from test 2, time-to-first pulmonary exacerbation through Week 48 and change from baseline in weight at Week 48 was tested using Hochberg's step-up procedure at significance level  $\alpha = 0.05$ .

Based on this testing procedure and the obtained nominal *P*-values, the primary endpoint and all the 4 key secondary endpoints were statistically significant. All other analyses of secondary, tertiary, and exploratory efficacy endpoints were not controlled for type I error. That is, *P*-values reported for these endpoints which are  $<0.05$  indicate nominal statistically significant results.

## **ADDITIONAL ACKNOWLEDGMENTS**

The VX08-770-102 Study Group included Richard Ahrens, University of Iowa, Iowa City, IA, USA; Moira Aitken, University of Washington, Seattle, WA, USA; Gopal Allada, Oregon Health & Sciences University, Portland, OR, USA; Raouf Amin, Cincinnati Children's Hospital Medical Center, Cincinnati, OH, USA; Ran Anbar, SUNY Upstate Medical University, Syracuse, NY, USA; Scott Bell, The Prince Charles Hospital, Chermshire, Australia; Joanne Billings, University of Minnesota, Minneapolis, MN, USA; Philip Black, The Children's Mercy Hospital, Kansas City, MO, USA; Drucy Borowitz, Women and Children's Hospital of Buffalo, Buffalo, NY, USA; Michael Boyle, Johns Hopkins University, Baltimore, MD, USA; Gerry Canny, Our Lady's Children's Hospital, Dublin, Ireland; Barry Clements, Princess Margaret Hospital for Children, Subiaco, Australia; Rubin Cohen, Long Island Jewish Medical Center, New Hyde Park, NY, USA; Peter Cooper, The Children's Hospital Westmead, Westmead, Australia; Jane Davies, Imperial College London, London, UK; Scott Donaldson, University of North Carolina at Chapel Hill, Chapel Hill, NC, USA; Pavel Drevinek, University Hospital in Motol, Czech Republic; J. Stuart Elborn, Belfast City Hospital, Belfast, UK; Isabelle Fajac, Hôpital Cochin, Paris, France; Albert Faro, Washington University, St. Louis, MO, USA; Deborah Froh, University of Virginia,

Charlottesville, VA, USA; Ronald Gibson, Seattle Children's Hospital, Seattle, WA, USA; Peter Grealley, The National Children's Hospital, Dublin, Ireland; Matthias Griese, Dr von Haunersches Kinderspital, University of Munich, Munich, Germany; Helge Hebestreit, University Children's Hospital, Julius-Maximilians-Universität Würzburg, Würzburg, Germany; Michael Konstan, Case Western Reserve University School of Medicine, Rainbow Babies and Children's Hospital, Cleveland, Ohio, USA; Larry Lands, Montreal Children's Hospital, Montreal, Quebec, Canada; Allen Lapey, Massachusetts General Hospital, Boston, MA, USA; Theodore Liou, University of Utah, Salt Lake City, UT, USA; Jochen Mainz, University of Jena, Children's Hospital, Jena, Germany; Susanna McColley, Children's Memorial Hospital, Chicago, IL, USA; Karen McCoy, Nationwide Children's Hospital, Columbus, OH, USA; Gerry McElvaney, Beaumont Hospital, Dublin, Ireland; Edward McKone, St. Vincent's University Hospital, Dublin, Ireland; Roger Michael, Queen Elizabeth II Health Sciences Centre, Halifax, Nova Scotia, Canada; Alison Miller, Vanderbilt University Medical Center, Nashville, TN, USA; Kathryn Moffett, West Virginia University, Morgantown, WV, USA; Richard Moss, Stanford University, Palo Alto, CA, USA; Siobhain Mulrennan, Lung Institute of Western Australia, Nedlands, Australia; Peter Murphy, University of Nebraska Medical Center, Omaha, NE, USA; Samya Nasr, University of Michigan, Ann Arbor, MI, USA; Mark Pian, Rady Children's Hospital, San Diego, CA, USA; Joseph Pilewski, Children's Hospital of Pittsburgh of UPMC, Pittsburgh, PA, USA; Barry Plant, Cork University Hospital, Cork, Ireland; Felix Ratjen, CF Center Hospital for Sick Children, Toronto, Ontario, Canada; Gilles Rault, Centre de Perharidy, Roscoff, France; Phil Robinson, Royal Children's Hospital Melbourne, Parkville, Australia; John Rogers, East Tennessee Children's Hospital, Knoxville, TN, USA; Steven Rowe, University of Alabama at Birmingham, Birmingham, AL, USA; Ronald Rubenstein, Children's Hospital of Philadelphia, Philadelphia, PA, USA; Aruna Sannuti, Indiana University, Indianapolis, IN, USA; Michael Schechter, Emory Cystic Fibrosis Center, Atlanta, GA, USA; David Serisier, Mater Adult Hospital, South Brisbane, Australia; Isabelle Sermet-Gaudelus, Hopital Necker, Paris, France; Gregory Shay, Kaiser Permanente Medical Care Program, Oakland, CA, USA; Jennifer Taylor-Cousar, National Jewish Medical and Research Center, Denver, CO, USA; Henry Thompson, St. Luke's CF Clinic, Boise, ID, USA; Elizabeth Tullis, St. Michael's Hospital, Toronto, Ontario, Canada; Ahmet Uluer, Children's Hospital Boston, Boston, MA, USA; Pierre Vauthy, Toledo Children's Hospital, Toledo, OH, USA; Robert Vender, Hershey Medical Center, Hershey, PA, USA; Claire Wainwright, Royal Children's Hospital Brisbane, Herston, Australia; Robert Zanni, Monmouth Medical Center, Long Branch, NJ, USA; Theodor Zimmerman, Universitaetsklinikum Erlangen, Erlangen, Germany.

The authors would like to thank all the patients involved in the study and the study coordinators, including Grace Mullins, Beaumont Hospital, Dublin, Ireland; Lisa Kent and Susan Martin, Belfast City

Hospital, Belfast, UK; Laetitia Guegantou, Centre de Perharidy, Roscoff, France; Mogenet Agnes, Centre d'Investigation Clinique - Hopital Necker, Paris, France; Catherine Correia, Children's Hospital Boston, Boston, MA, USA; Erin Hogge, Children's Hospital of Philadelphia, Philadelphia, PA, USA; Adrienne Horn, Children's Hospital of Pittsburgh at UPMC, Pittsburgh, PA, USA; Cathy Powers, Children's Memorial Hospital, Chicago, IL, USA; Margo Moore, Cincinnati Children's Hospital, Cincinnati, OH, USA; Oisín O'Connell, Cork University Hospital, Cork, Ireland; Swati Rogers, East Tennessee Children's Hospital, Knoxville, TN, USA; Jeannie Peabody, Emory Cystic Fibrosis Center, Atlanta, GA, USA; Diane Kitch, Hershey Medical Center, Hershey, PA, USA; Marie-Jo Toro, Hopital Cochin, Paris, France; Kristy Barca and Renee Jensen, Hospital for Sick Children, Toronto, Ontario, Canada; Annette Hempfling, Indiana University, Indianapolis, IN, USA; Erin Felling, Johns Hopkins University, Baltimore, MD, USA; Julie Lee, Kaiser Permanente Medical Care Program, Oakland, CA, USA; Ines Yawa, Kinder- und Jugendklinik, Universitätsklinikum Erlangen, Erlangen, Germany; Claudia Eismann, Klinikum der Universität München, Ambulance für Mukoviszidose, München, Germany; Li Chen Wann, Long Island Jewish Medical Center, New Hyde Park, NY, USA; Emily Stevens, Lung Institute of Western Australia, Nedlands, Australia; Abigail King, Massachusetts General Hospital, Boston, MA, USA; Megan Martin, Mater Adult Hospital, South Brisbane, Australia; Patricia Grover, Minnesota Cystic Fibrosis Center, Minneapolis, MN, USA; Bridget Marra and Natalie Skurat, Monmouth Medical Center, Long Branch, NJ, USA; Nancy Alarie, Montreal Children's Hospital, Montreal, Quebec, Canada; Claudia Schien, Mukoviszidose-Zentrum am Klinikum der Friedrich-Schiller-Universität Jena, Klinik für Kinder- und Jugendmedizin, Jena, Germany; Connie Pickard, National Jewish Medical and Research Center, Denver, CO, USA; Terri Johnson, Nationwide Children's Hospital, Columbus, OH, USA; Aaron Guzik, Oregon Health & Science University, Portland, OR, USA; Rachel Hennessy, Our Lady's Children's Hospital, Dublin, Ireland; Catherine Gangell, Princess Margaret Hospital for Children, Subiaco, Australia; Andrea Dale, Queen Elizabeth II Health Sciences Centre, Halifax, Nova Scotia, Canada; Sarah Holland, Rady Children's Hospital, San Diego, CA, USA; Bobbi Ksenich, Rainbow Babies and Children's Hospital, Cleveland, OH, USA; Sandra Scott and Lauren McCann, Royal Brompton Hospital, London, UK; Mary Jackson, Royal Children's Hospital Brisbane, Herston, Australia; Alexandra Robinson and Nadeene Clarke, Royal Children's Hospital Melbourne, Parkville, Australia; Alan Genatossio, Seattle Children's Hospital, Seattle, WA, USA; Dixie Durham, St. Luke's CF Clinic, Boise, ID, USA; Myra Slutsky, St. Michael's Hospital, Toronto, Ontario, Canada; Catherine McEvoy, St. Vincent's University Hospital, Dublin, Ireland; Zoe Davies and Colleen Dunn, Stanford University, Palo Alto, CA, USA; Donna Linder, SUNY Upstate Medical University, Syracuse, NY, USA; Karen McKay, The Children's Hospital Westmead, Westmead, Australia; Candy Schmoll, The Children's Mercy Hospital, Kansas City, MO, USA; Geraldine Leen, The National Children's Hospital, Dublin, Ireland; Michelle Wood, The



Prince Charles Hospital, Chermside, Australia; Michelle Robinette, The Vanderbilt Clinic, Nashville, TN, USA; Kelly Houser, Toledo Children's Hospital, Toledo, OH, USA; Anette Scharschinger, Universitäts-Kinderklinik Würzburg, Würzburg, Germany; Tajuanna Lucious, University of Alabama at Birmingham, Birmingham, AL, USA; Nadine Caci, University at Buffalo, Buffalo, NY, USA; Mary Teresi, University of Iowa, Iowa City, IA, USA; Dawn Kruse, University of Michigan, Ann Arbor, MI, USA; Debra Heimes, University of Nebraska Medical Center, Omaha, NE, USA; Carol Barlow, University of North Carolina at Chapel Hill, Chapel Hill, NC, USA; Kristyn Packer and Judy Jensen, University of Utah, Salt Lake City, UT, USA; Patricia Moss, University of Virginia, Charlottesville, VA, USA; Alycia Wolfstone, University of Washington, Seattle, WA, USA; Mary Boyle, Washington University, St. Louis, MO, USA; Tammy Clark, West Virginia University, Morgantown, WV, USA;

## **SUPPLEMENTAL REFERENCES**

1. Farrell PM, Rosenstein BJ, White TB, et al. Guidelines for diagnosis of cystic fibrosis in newborns through older adults: Cystic Fibrosis Foundation consensus report. *Journal of Pediatrics* 2008;153:S4-S14.
2. Knudson RJ, Lebowitz MD, Holberg CJ, Burrows B. Changes in the normal maximal expiratory flow-volume curve with growth and aging. *American Review of Respiratory Disease* 1983;127:725-34.
3. Standardization of Spirometry, 1994 Update. American Thoracic Society. *American Journal of Respiratory and Critical Care Medicine* 1995;152:1107-36.
4. Fuchs HJ, Borowitz D, Christiansen DH, et al. Effect of aerosolized recombinant human DNase on exacerbations of respiratory symptoms and on pulmonary function in patients with cystic fibrosis. The Pulmozyme Study Group. *New England Journal of Medicine* 1994;331:637-42.
5. Quittner AL, Buu A, Messer MA, Modi AC, Watrous M. Development and validation of The Cystic Fibrosis Questionnaire in the United States: a health-related quality-of-life measure for cystic fibrosis. *Chest* 2005;128:2347-54.
6. Accurso FJ, Rowe SM, Clancy JP, et al. Effect of VX-770 in persons with cystic fibrosis and the G551D-CFTR mutation. *New England Journal of Medicine* 2010;363:1991-2003.

**Supplemental Table 1.** Summary of results through 24 and 48 weeks.

| Endpoint                                                         | Week 24   |         |                                                     | Week 48   |         |                                                     |
|------------------------------------------------------------------|-----------|---------|-----------------------------------------------------|-----------|---------|-----------------------------------------------------|
|                                                                  | Ivacaftor | Placebo | Difference                                          | Ivacaftor | Placebo | Difference                                          |
|                                                                  | (N=83)    | (N=78)  | 95% CI<br>p-value                                   | (N=83)    | (N=78)  | 95% CI<br>p-value                                   |
| FEV <sub>1</sub> % predicted absolute change from baseline, mean | 10.4      | -0.2    | 10.6%<br>(8.6,12.6)<br><i>P</i> <0.0001             | 10.1      | -0.4    | 10.5%<br>(8.5, 12.5)<br><i>P</i> <0.0001            |
| FEV <sub>1</sub> (L) change from baseline, mean                  | 0.4       | 0.0     | 0.4<br>(0.3, 0.4)<br><i>P</i> <0.0001               | 0.4       | 0.0     | 0.4<br>(0.3, 0.4)<br><i>P</i> <0.0001               |
| FEV <sub>1</sub> relative change from baseline , mean            | 17.6      | 0.7     | 16.9<br>(13.6, 20.2)<br><i>P</i> <0.0001            | 17.5      | 0.8     | 16.8<br>(13.5, 20.1)<br><i>P</i> <0.0001            |
| Sweat chloride (mmol/L) change from baseline, mean               | -48.7     | -0.8    | -47.9<br>(-51.3, -44.5)<br><i>P</i> <0.0001         | -48.7     | -0.6    | -48.1<br>(-51.5, -44.7)<br><i>P</i> <0.0001         |
| Pulmonary exacerbations, No. subjects                            | 18        | 35      | Rate ratio 0.38<br>(0.22, 0.64)<br><i>P</i> =0.0003 | 28        | 44      | Rate ratio 0.43<br>(0.27, 0.68)<br><i>P</i> =0.0003 |
| Weight (kg) change from baseline , mean                          | 3.0       | 0.2     | 2.8<br>(1.8, 3.7)<br><i>P</i> <0.0001               | 3.1       | 0.4     | 2.7<br>(1.3, 4.1)<br><i>P</i> <0.0001               |

**Supplemental Table 2.** Rate and duration of pulmonary exacerbations and associated events through Week 48.

**2A. Rate of event occurrence through Week 48\*, n (rate per subject)**

| <b>Event Type</b>                                | <b>Placebo<br/>(N=78)</b> | <b>Ivacaftor<br/>(N=83)</b> | <b>p-value</b> |
|--------------------------------------------------|---------------------------|-----------------------------|----------------|
| Pulmonary exacerbation                           | 99 (1.38)                 | 47 (0.59)                   | 0.0003         |
| Pulmonary exacerbation requiring hospitalization | 31 (0.49)                 | 21 (0.31)                   | 0.1948         |
| Pulmonary exacerbation requiring IV antibiotics  | 47 (0.71)                 | 28 (0.40)                   | 0.0776         |

\*Estimates were obtained from negative binomial

**2B. Normalized total time with events through Week 48\*, mean (SD), days**

| <b>Event Type</b>                                                 | <b>Placebo<br/>(N=78)</b> | <b>Ivacaftor<br/>(N=83)</b> | <b>p-value<sup>†</sup></b> |
|-------------------------------------------------------------------|---------------------------|-----------------------------|----------------------------|
| Days with pulmonary exacerbations                                 | 36.7 (49.5)               | 13.5 (27.3)                 | 0.0007                     |
| Days hospitalized for pulmonary exacerbations                     | 4.15 (8.71)               | 3.92 (13.62)                | 0.0275                     |
| Days with IV antibiotics administered for pulmonary exacerbations | 11.03 (20.36)             | 6.68 (19.43)                | 0.0183                     |

\*Days with events are normalized to time on study (i.e. 336 days for Week 48)

<sup>†</sup>P-values are from a stratified (by baseline % Predicted FEV<sub>1</sub> Severity and Age group) Wilcoxon rank-sum test

**Supplemental Table 3.** Adverse events leading to study drug interruption.

**Ivacaftor Subjects**

| <b>Subject</b> | <b>Adverse event</b>                                                                                   |
|----------------|--------------------------------------------------------------------------------------------------------|
| 1              | Hemoptysis                                                                                             |
| 2              | Migraine                                                                                               |
| 3              | Pulmonary exacerbation<br>Anaphylactic shock                                                           |
| 4              | Lymph node pain<br>Gynecomastia                                                                        |
| 5              | Pulmonary exacerbation                                                                                 |
| 6              | Hepatic enzyme increased                                                                               |
| 7              | Hepatic enzyme increased                                                                               |
| 8              | Vulvovaginal mycotic infection<br>Oral candidiasis<br>Pulmonary exacerbation<br>Pulmonary exacerbation |
| 9              | Myalgia<br>Diarrhea                                                                                    |
| 10             | Upper respiratory tract infection                                                                      |
| 11             | Weight decreased<br>Pulmonary exacerbation                                                             |

No subjects discontinued treatment after drug interruption

**Placebo Subjects**

| <b>Subject</b> | <b>Adverse event</b>                                              |
|----------------|-------------------------------------------------------------------|
| 1              | Blood lactate dehydrogenase increased<br>Hepatic enzyme increased |
| 2              | Migraine                                                          |
| 3              | Pulmonary exacerbation                                            |
| 4              | Rash<br>Nephrolithiasis<br>Renal colic                            |
| 5*             | Vomiting<br>Respiratory distress                                  |

\*Subject subsequently discontinued treatment after drug interruption

**Supplemental Table 4.** Adverse events occurring in  $\geq 10\%$  in either treatment group through Week 48.

| Adverse event, n (%)              | Placebo   | Ivacaftor |
|-----------------------------------|-----------|-----------|
|                                   | (N=78)    | (N=83)    |
| Pulmonary exacerbation*           | 50 (64.1) | 34 (41.0) |
| Cough                             | 33 (42.3) | 27 (32.5) |
| Headache                          | 13 (16.7) | 19 (22.9) |
| Upper respiratory tract infection | 12 (15.4) | 19 (22.9) |
| Oropharyngeal pain                | 15 (19.2) | 17 (20.5) |
| Nasal congestion                  | 12 (15.4) | 17 (20.5) |
| Abdominal pain                    | 10 (12.8) | 13 (15.7) |
| Nausea                            | 9 (11.5)  | 13 (15.7) |
| Productive cough                  | 11 (14.1) | 12 (14.5) |
| Rash                              | 4 (5.1)   | 12 (14.5) |
| Diarrhea                          | 10 (12.8) | 11 (13.3) |
| Dizziness                         | 1 (1.3)   | 10 (12.0) |
| Nasopharyngitis                   | 10 (12.8) | 10 (12.0) |
| Pyrexia                           | 9 (11.5)  | 10 (12.0) |
| Hemoptysis                        | 17 (21.8) | 9 (10.8)  |
| Rales                             | 8 (10.3)  | 9 (10.8)  |
| Vomiting                          | 10 (12.8) | 9 (10.8)  |
| Pulmonary function test decreased | 11 (14.1) | 3 (3.6)   |

\*coded as Cystic fibrosis lung

**Supplemental Table 5.** Maximum liver function test abnormalities during treatment through Week 48.

| <b>Maximum Result</b> | <b>Placebo<br/>(N=78)<br/>n (%)</b> | <b>Ivacaftor<br/>(N=83)<br/>n (%)</b> |
|-----------------------|-------------------------------------|---------------------------------------|
| <b>2x to 3x ULN</b>   |                                     |                                       |
| AST                   | 4 (5.1)                             | 8 (9.6)                               |
| ALT                   | 6 (7.7)                             | 5 (6.0)                               |
| Bilirubin             | 1 (1.3)                             | 2 (2.4)                               |
| <b>3x to 5x ULN</b>   |                                     |                                       |
| AST                   | 2 (2.6)                             | 1 (1.2)                               |
| ALT                   | 2 (2.6)                             | 0                                     |
| Bilirubin             | 0                                   | 0                                     |
| <b>5x to 8x ULN</b>   |                                     |                                       |
| AST                   | 0                                   | 1 (1.2)                               |
| ALT                   | 1 (1.3)                             | 0                                     |
| Bilirubin             | 0                                   | 0                                     |
| <b>8x ULN</b>         |                                     |                                       |
| AST                   | 1 (1.3)                             | 1 (1.2)                               |
| ALT                   | 0                                   | 3 (3.6)                               |
| Bilirubin             | 0                                   | 0                                     |

**Supplemental Table 6.** Chronic medications utilized prior to the study.

| <b>Medication, n (%)</b> | <b>Placebo<br/>(N=78)</b> | <b>Ivacaftor<br/>(N=83)</b> |
|--------------------------|---------------------------|-----------------------------|
| Dornase alfa             | 57 (73.1)                 | 54 (65.1)                   |
| Azithromycin             | 50 (64.1)                 | 51 (61.4)                   |
| Salbutamol               | 56 (71.8)                 | 53 (63.9)                   |
| Inhaled tobramycin       | 35 (44.9)                 | 28 (33.7)                   |
| Fluticasone-salmeterol   | 32 (41.0)                 | 23 (27.7)                   |
| Ibuprofen                | 9 (11.5)                  | 14 (16.9)                   |
| Inhaled colistin         | 5 (6.4)                   | 9 (10.8)                    |
| Montelukast sodium       | 13 (16.7)                 | 5 (6.0)                     |
| Inhaled aztreonam        | 0                         | 1 (1.2)                     |

**Supplemental Figure 1.** Subject disposition.

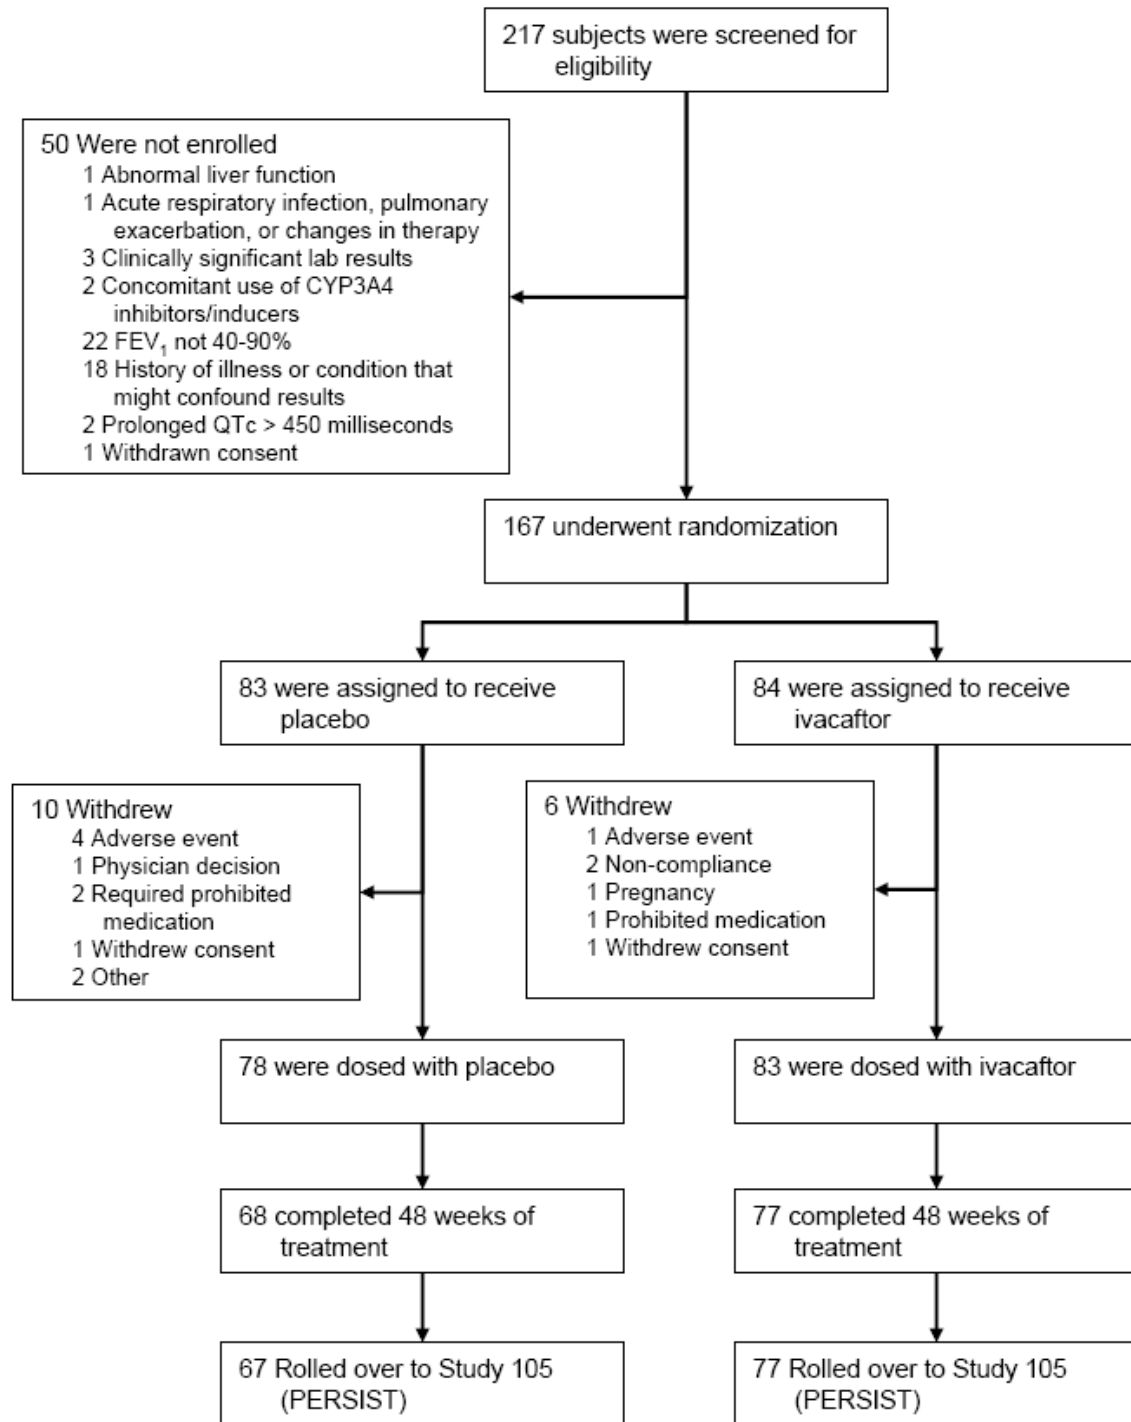



**Supplemental Figure 2.** Distribution of responses. Panel A shows the absolute change from baseline in FEV<sub>1</sub> response through 24 weeks. Panel B shows the absolute change from baseline in sweat chloride response through 24 weeks.

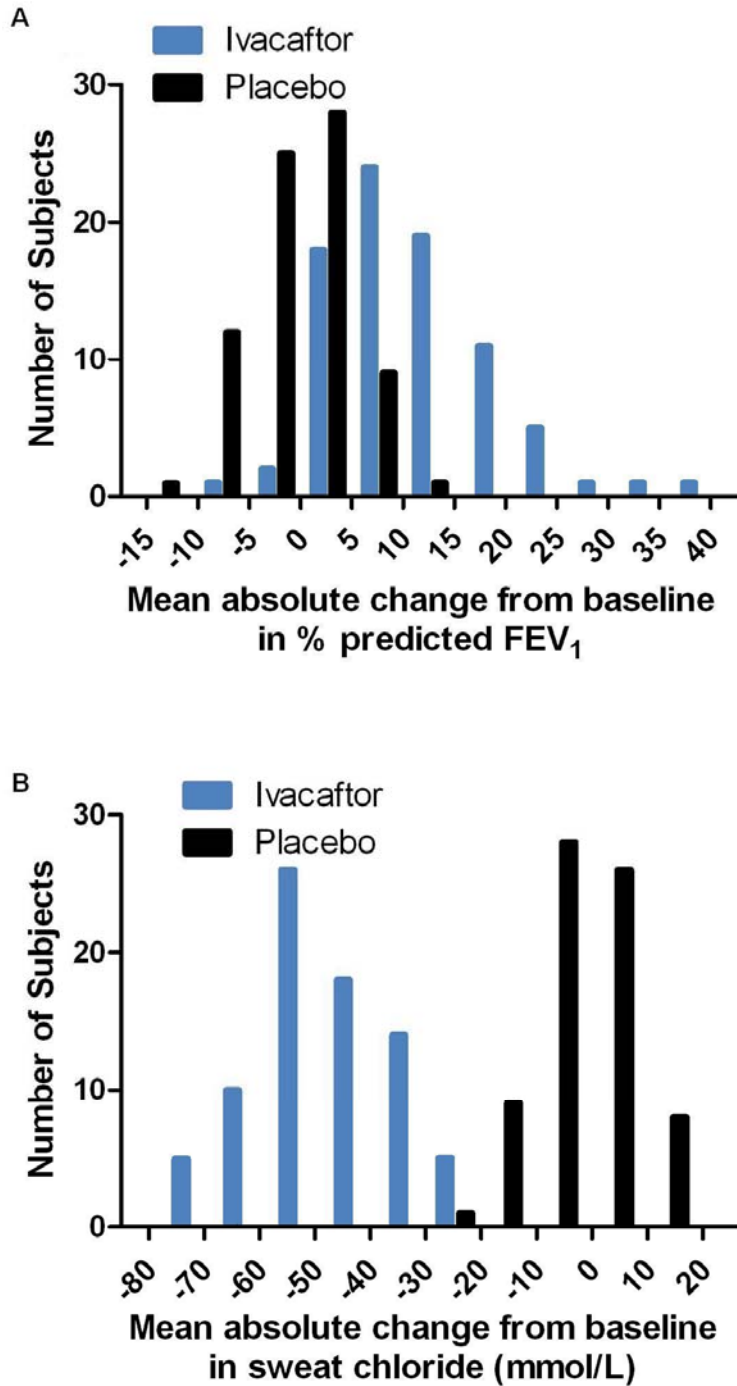

Counts displayed as bars include results on the upper boundary and exclude results on the lower boundary of the intervals

**Supplemental Figure 3.** FEV<sub>1</sub> additional analyses. Panel A shows the relative mean change from baseline (with 95% confidence intervals) in FEV<sub>1</sub> % predicted. Panel B shows the absolute mean change from baseline (with 95% confidence intervals) in FEV<sub>1</sub> % predicted for the subgroup of subjects with baseline predicted FEV<sub>1</sub> in the range of 40% to 50%, inclusive.

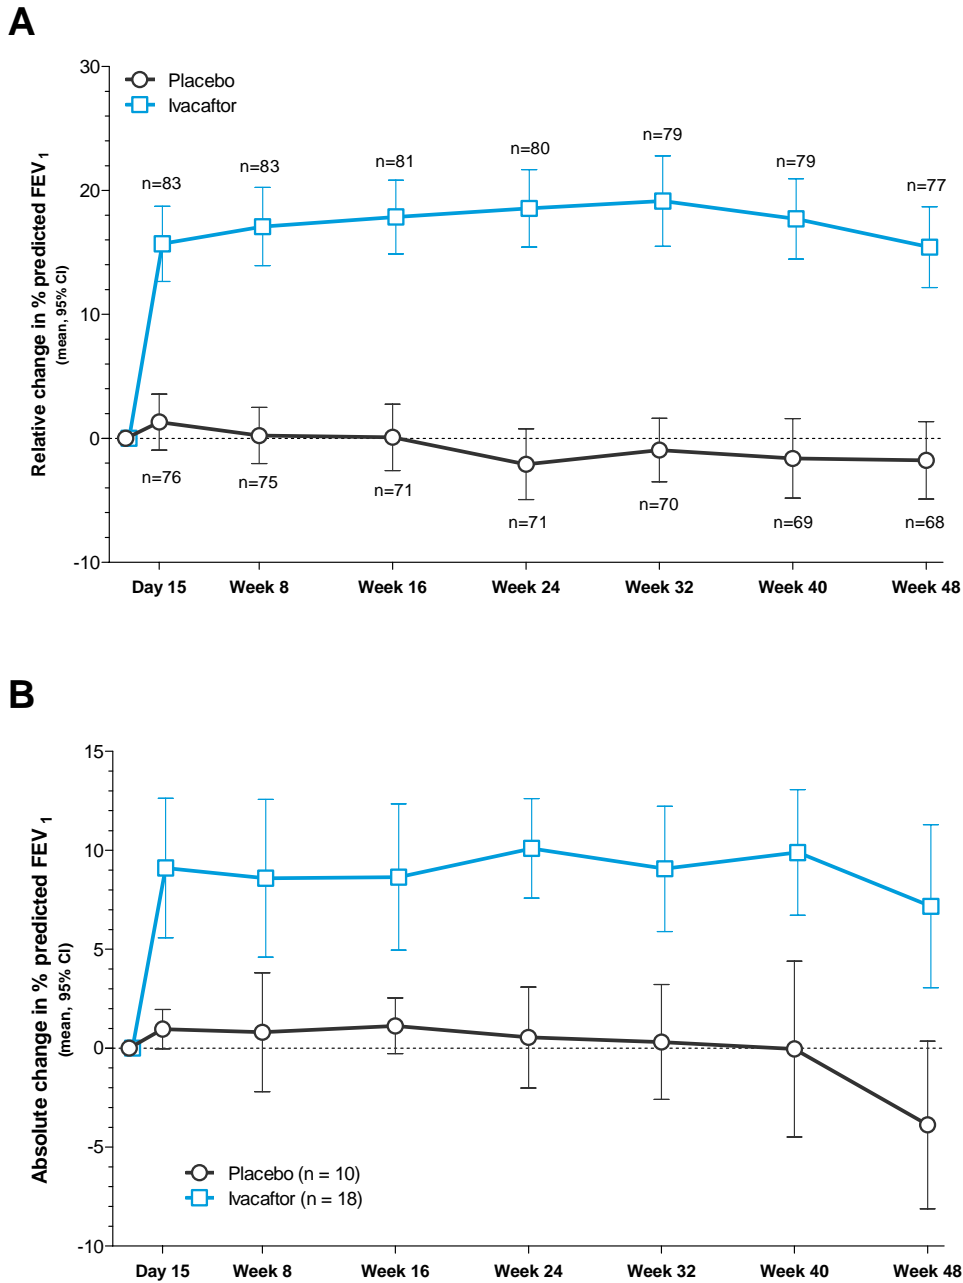

**Supplemental Figure 4.** Changes from baseline through Weeks 24 and 48 in additional spirometry parameters by treatment group. Panel A shows the absolute change from baseline in  $FEF_{25-75\%}$ , Panel B shows the absolute change from baseline in FVC. Panel C shows the absolute change from baseline in the ratio of  $FEV_1/FVC$ .

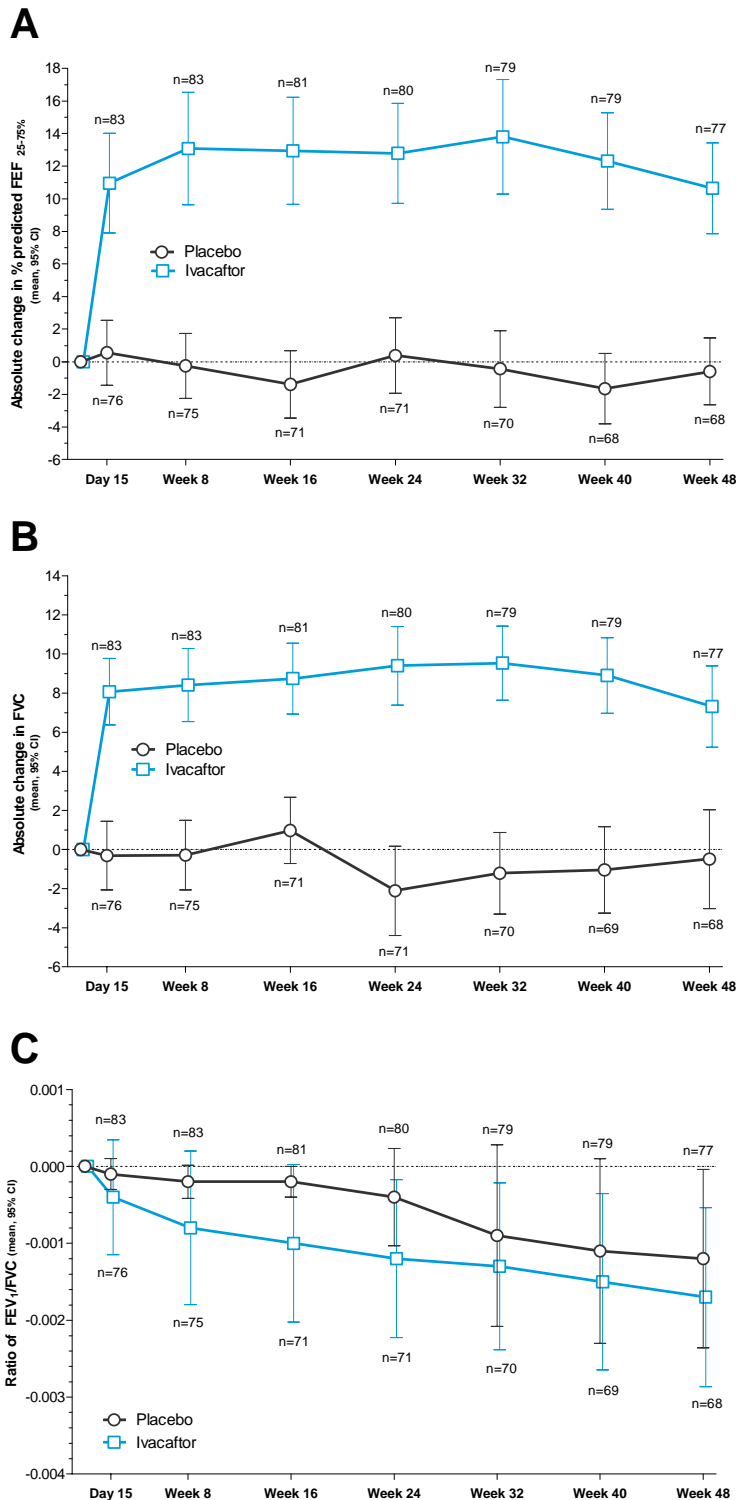

Supplement: NIHMS338788-supplement-Supplement1.pdf [file NIHMS338788-supplement-Supplement1.pdf]
